# Supplementary material
Source: MDPI journal article supplement (https://www.mdpi.com/2075-163X/11/11/1289)
Supplement: s1 [file s1 › minerals-1459727-supplementary.pdf]

**Supplementary information for: Determination of trace metal (Mn, Fe, Ni, Cu, Zn, Co, Cd and Pb) concentrations in seawater using single quadrupole ICP-MS: A comparison between offline and online preconcentration setups**

Saumik Samanta<sup>a§\*</sup>, Ryan Cloete<sup>a§\*</sup>, Jean Looock<sup>a§</sup>, Riana Rossouw<sup>b</sup> and Alakendra Roychoudhury<sup>a\*</sup>

<sup>a</sup>Centre for Trace Metal and Experimental Biogeochemistry (TracEx), Department of Earth Sciences, Stellenbosch University, Private Bag X1, Matieland 7602, South Africa

<sup>b</sup>Central Analytical Facility ICP MS Unit, Department of Earth Sciences, University of Stellenbosch, Private Bag XI, Matieland 7602, South Africa

<sup>§</sup>These authors contributed equally

\*Corresponding author: [saumiksamanta@gmail.com](mailto:saumiksamanta@gmail.com); [ryan.cloete76@gmail.com](mailto:ryan.cloete76@gmail.com), [roy@sun.ac.za](mailto:roy@sun.ac.za)

Includes:

- Supplemental Figure: Figure S1
- Supplemental Figure: Figure S2

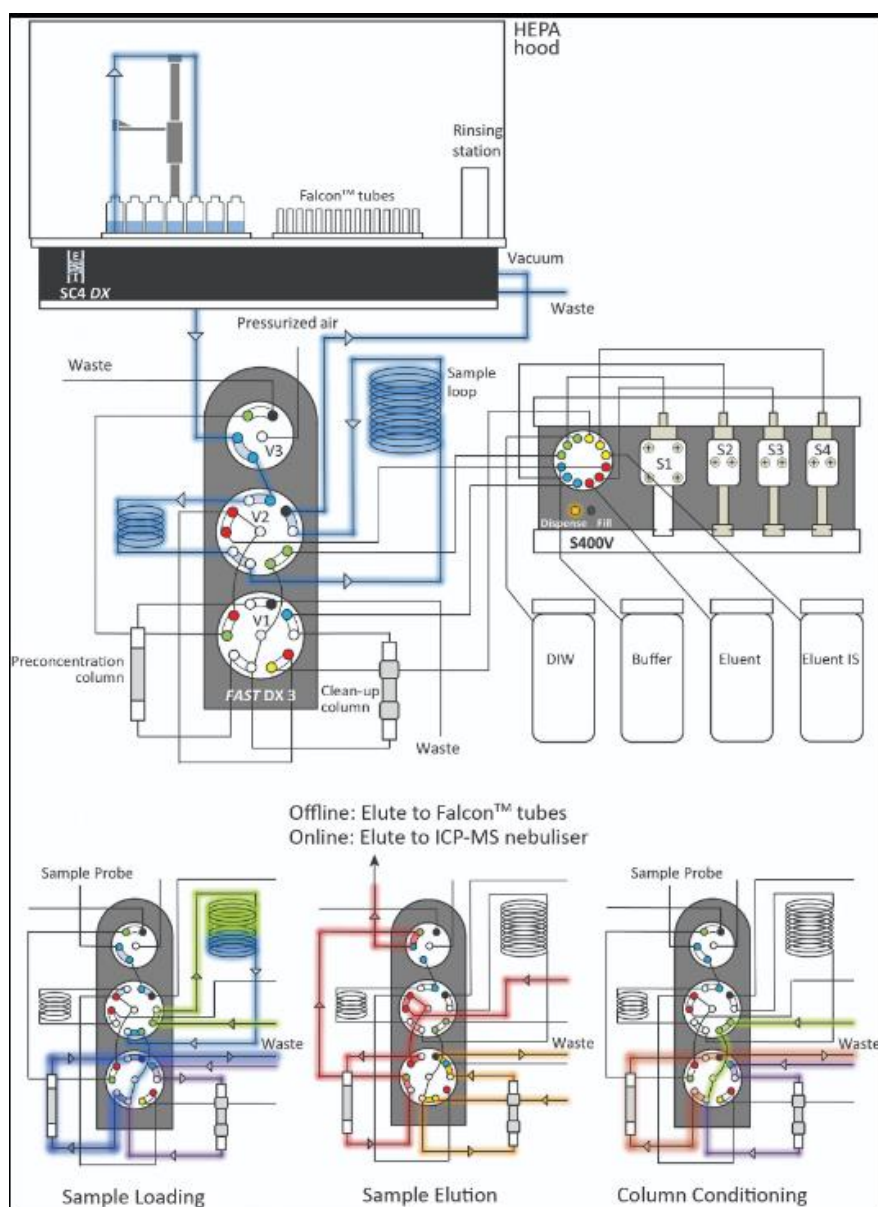

Figure S1. Schematic setups of online and offline seaFAST systems, modified from previous study [1], represent the different steps of seaFAST operation. Blue line in the top panel shows the sample uptake into the sample loop. Green line in the bottom panels: DIW, Purple: Buffer, dark blue line in the bottom left column: sample and buffer mixture, red line bottom middle panel: Eluent. For offline setup, eluent is collected in falcon tube kept in the sample rack in SC-4DX module. For online, eluent is directly introduced to the nebulizer of ICP-MS.

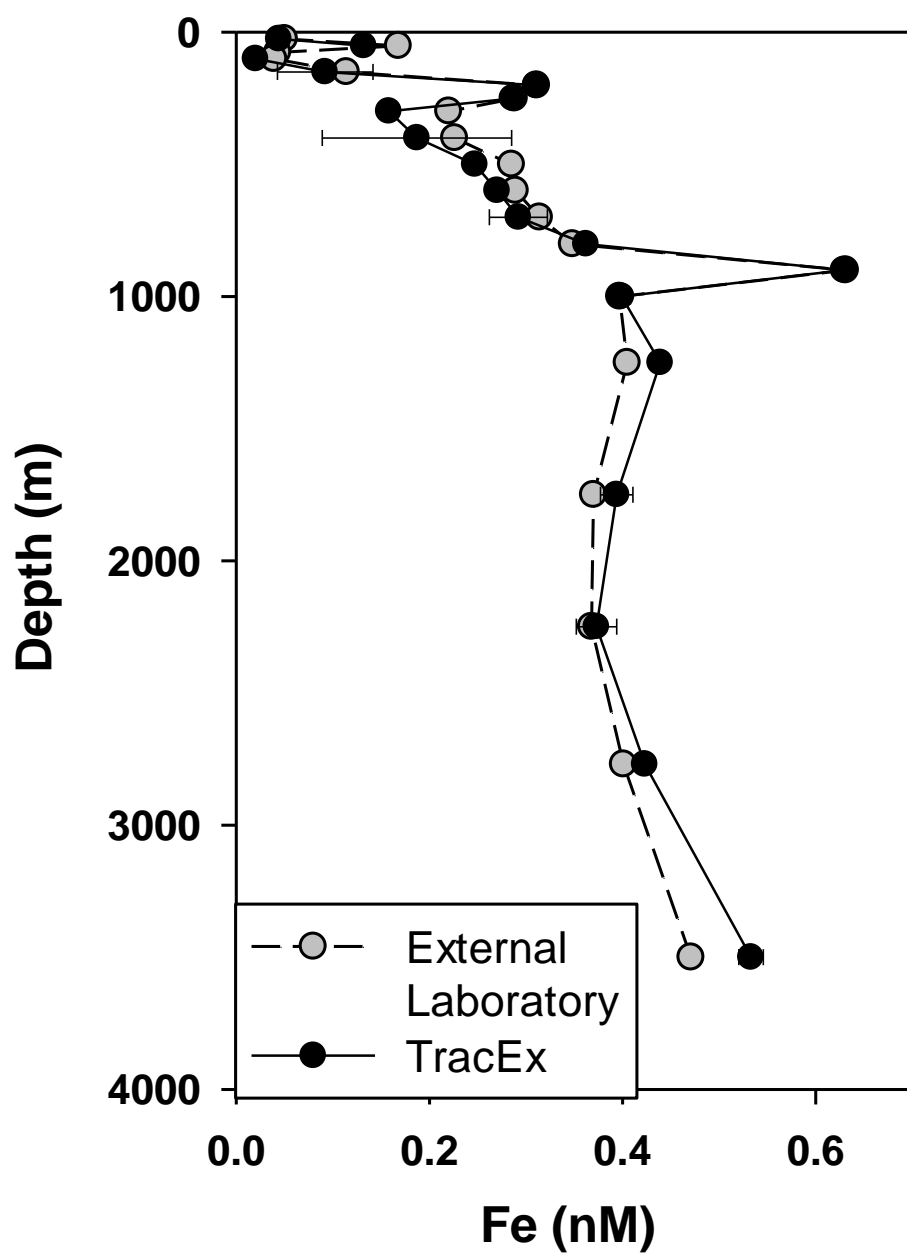

Figure S2. Comparison of Fe measurements from this study and an external laboratory. Samples were collected from 56°S; 30°E (Southern Ocean) and were analysed via the offline preconcentration method described in this study as well as by an external laboratory using an offline preconcentration and SF-ICP-MS technique.

### Supplementary References

1. Rapp, I.; Schlosser, C.; Rusiecka, D.; Gledhill, M.; Achterberg, E.P. Automated preconcentration of Fe, Zn, Cu, Ni, Cd, Pb, Co, and Mn in seawater with analysis using high-resolution sector field inductively- coupled plasma mass spectrometry. *Anal. Chim. Acta* **2017**, 976, 1–13, doi:10.1016/j.aca.2017.05.008.
